# Supplementary figures and images for: Genomic and Phenotypic Characterization of Cutibacterium acnes Bacteriophages Isolated from Acne Patients
Source: MDPI journal article supplement (doi:10.3390/antibiotics11081041), 2022-08-02

Supplementary Figure S1.

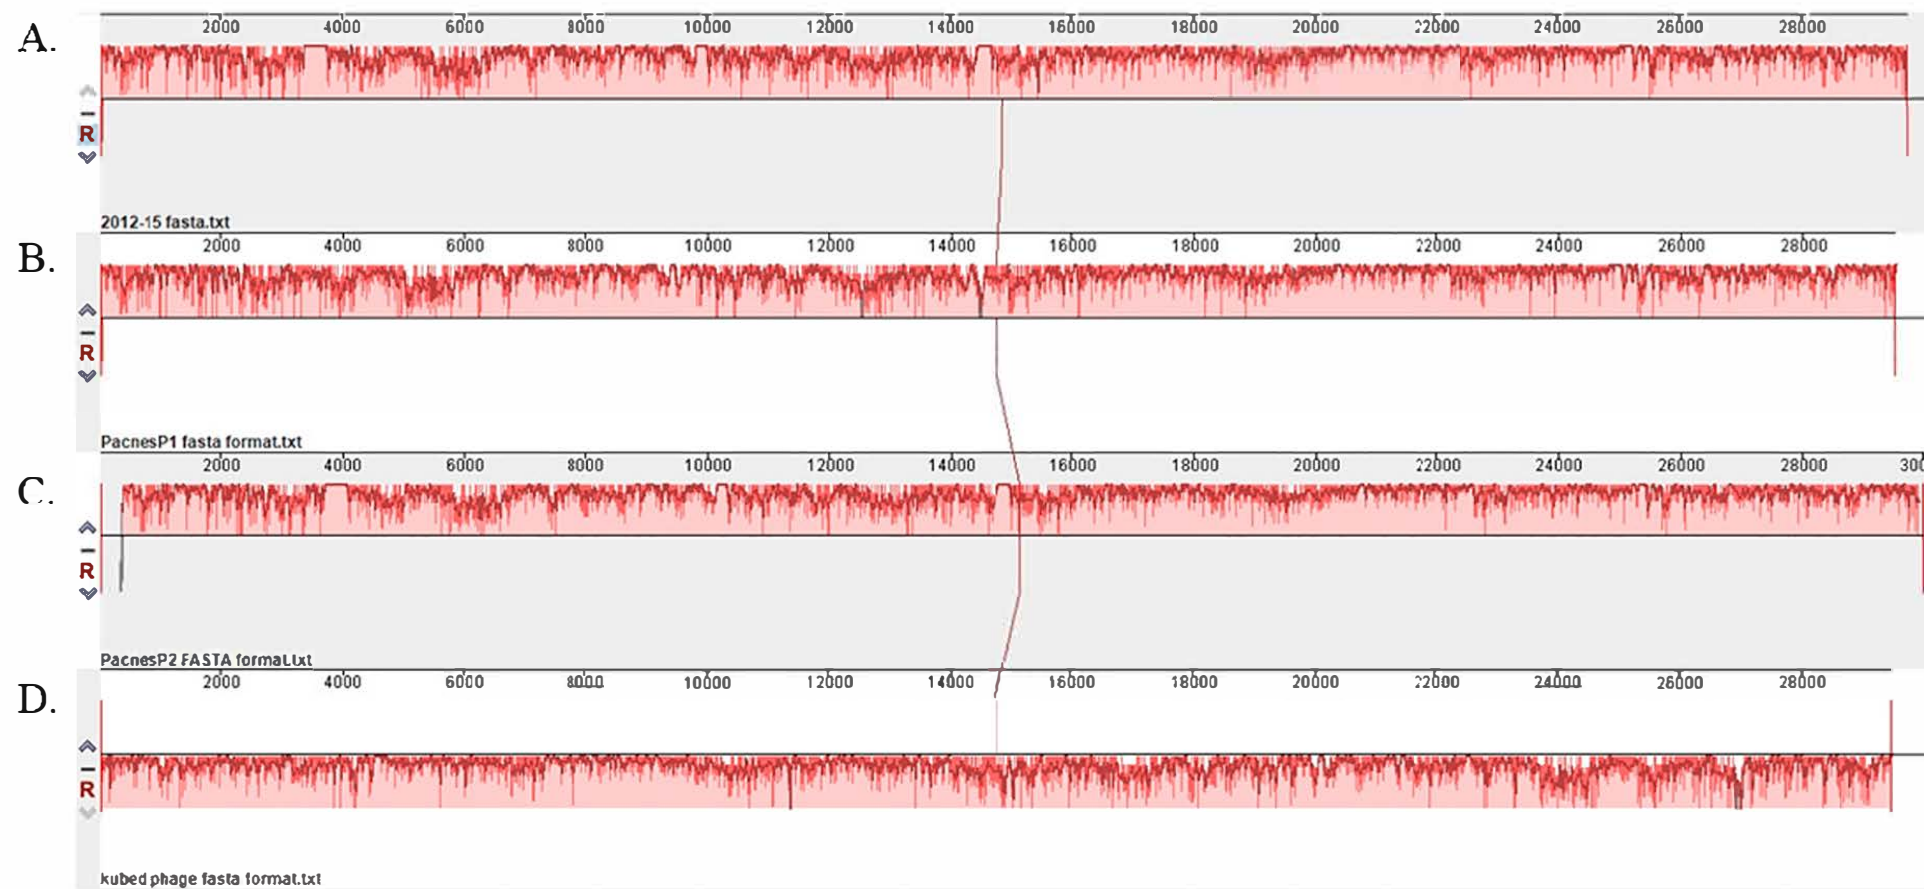

Supplement: s1 [file s1]

Supplementary Figure S2.

A.

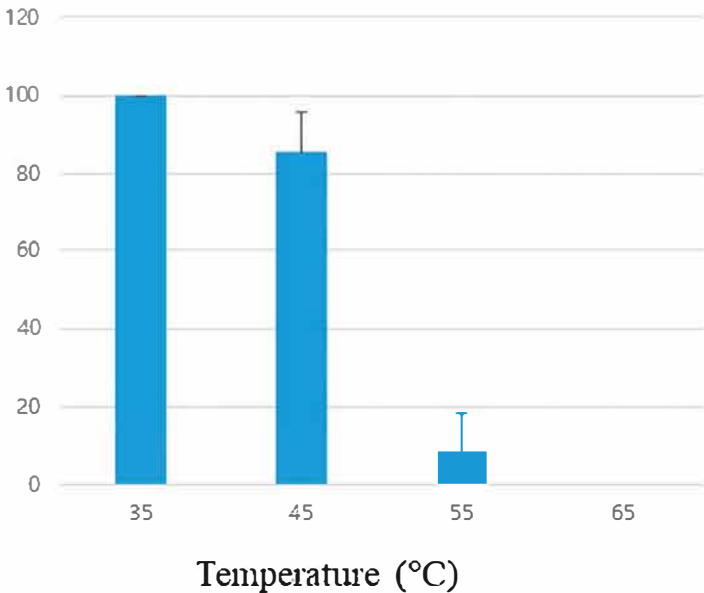

B.

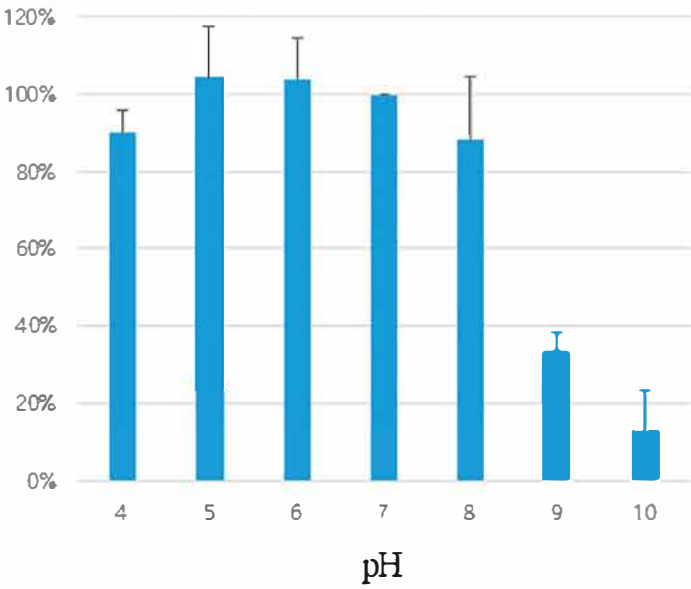

Supplement: s1 [file s1]
